# Supplementary material for: The Mitochondrial-Derived Peptide MOTS-c Alleviates Radiation Pneumonitis via an Nrf2-Dependent Mechanism
Source: MDPI journal article supplement (doi:10.3390/antiox13050613), 2024-05-17
Supplement: s1 [file s1]

Table 1 Primer sequences

| Target gene                    | Primer  | Primer sequences (5'–3') |
|--------------------------------|---------|--------------------------|
| <i>GAPDH</i>                   | Forward | TGGCCTTCCGTGTTCCCTAC     |
|                                | Reverse | GAGTTGCTGTTGAAGTCGCA     |
| <i>NFE2L2</i>                  | Forward | TCTTGGAGTAAGTCGAGAAGTGT  |
|                                | Reverse | GTTGAAACTGAGCGAAAAAGGC   |
| <i>HO-1</i>                    | Forward | AAGCCGAGAATGCTGAGTTCA    |
|                                | Reverse | GCCGTGTAGATATGGTACAAGGA  |
| <i>NQO-1</i>                   | Forward | AGGATGGGAGGTACTCGAATC    |
|                                | Reverse | TGCTAGAGATGACTCGGAAGG    |
| <i>Bax</i>                     | Forward | AGACAGGGGCCTTTTGTCTAC    |
|                                | Reverse | AATTCGCCGGAGACACTCG      |
| <i>Bcl2</i>                    | Forward | GAGAGCGTCAACAGGGAGATG    |
|                                | Reverse | CCAGCCTCCGTTATCCTGGA     |
| <i>Caspase9</i>                | Forward | GGCTGTAAACCCCTAGACCA     |
|                                | Reverse | TGACGGGTCCAGCTTCACTA     |
| <i>IL-6</i>                    | Forward | ACTTCCATCCAGTTGCCTTCTTGG |
|                                | Reverse | TTAAGCCTCCGATTGTGAAGTG   |
| <i>TNF-<math>\alpha</math></i> | Forward | CCTGTAGCCACGTCGTAG       |
|                                | Reverse | GGGAGTAGACAAGGTACAACCC   |
| <i>SP-C</i>                    | Forward | ATGGAGAGTCCACCGGATTAC    |
|                                | Reverse | ACCACGATGAGAAGGCGTTTG    |
| <i>COX I</i>                   | Forward | GAAGAGACAGTGTTCATGTGGTGT |
|                                | Reverse | TCCTGGGCCTTTCAGGAATA     |
| <i>COX IV</i>                  | Forward | ATTGGCAAGAGAGCCATTTCTAC  |
|                                | Reverse | TGGGGAAAGCATAGTCTTCACT   |
