# Supplementary material for: The Mitochondrial-Derived Peptide MOTS-c Alleviates Radiation Pneumonitis via an Nrf2-Dependent Mechanism
Source: MDPI journal article supplement (doi:10.3390/antiox13050613), 2024-05-17
Supplement: s1 [file s1]

**Figure S1**

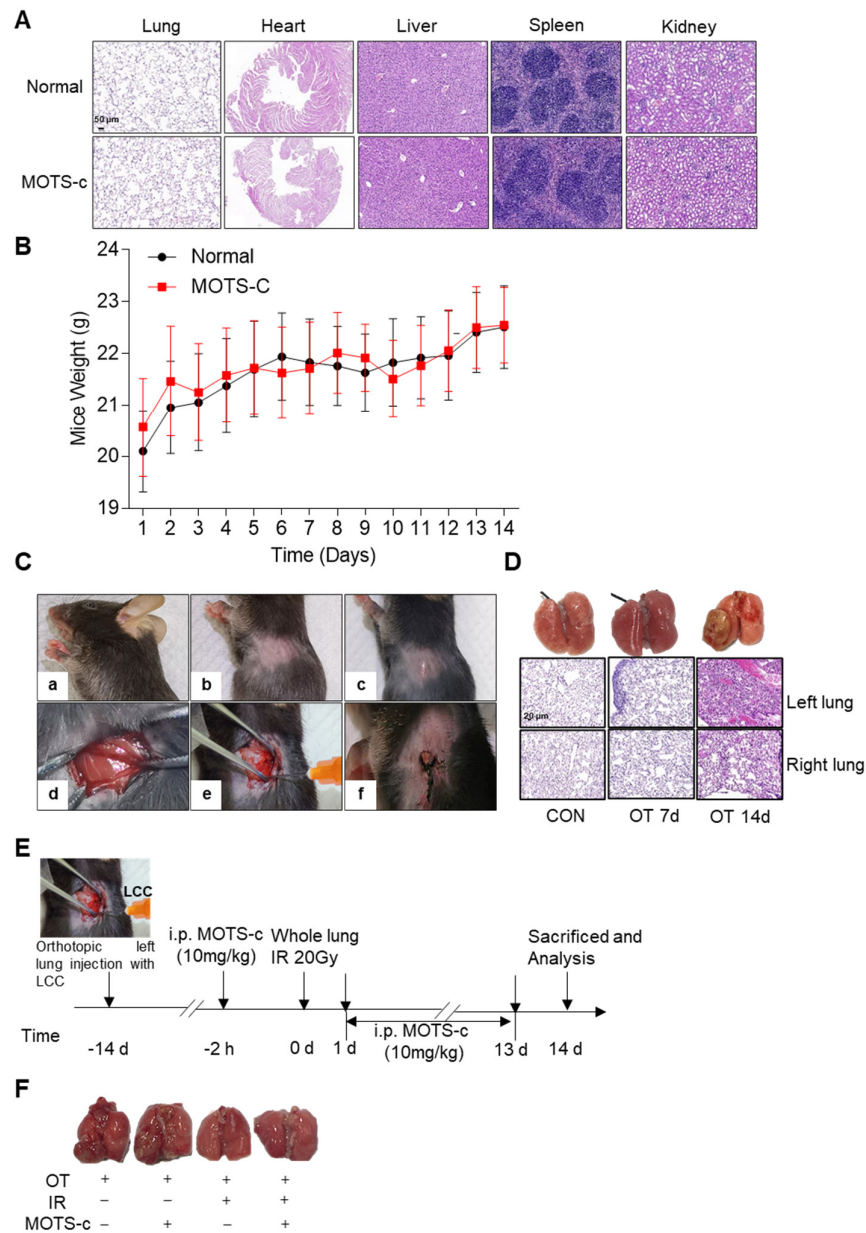

**Figure. S1** Effect of MOTS-c on different organs of normal mice and tumor radiotherapy of orthotopic transplantation of lung cancer mice. (A-B) Mice were received intraperitoneal injections of 10 mg/kg MOTS-c peptide dissolved in ddH<sub>2</sub>O daily for 14 days. (A) Representative images of H&E staining of lung, heart, liver, spleen, and kidney, scale bar, 50  $\mu$ m,  $n=5$ . (B) Mice's body weight was measured during MOTS-c intervention for 2 weeks,  $n=5$ . (C-F) Effect of MOTS-c on the efficacy of radiotherapy in an orthotopic transplantation model of lung cancer. (C) Establishment of orthotopic transplantable model of lung cancer in C57BL/6 mice. (a Anesthesia; b Left lung localization; c Skin preparation; d The incision was opened with forceps to expose the left lung; e Tumor cells were inoculated; f Sutured the incision.) (D) Tumor formation in orthotopic transplantation model of lung cancer. Representative images of H&E staining of lung, scale bar, 20  $\mu$ m,  $n=5$ . (E) The schematic timeline of radiation therapy in orthotopic transplantation models of lung cancer. (F) Gross morphology of lung tissue after radiotherapy.

**Figure S2**

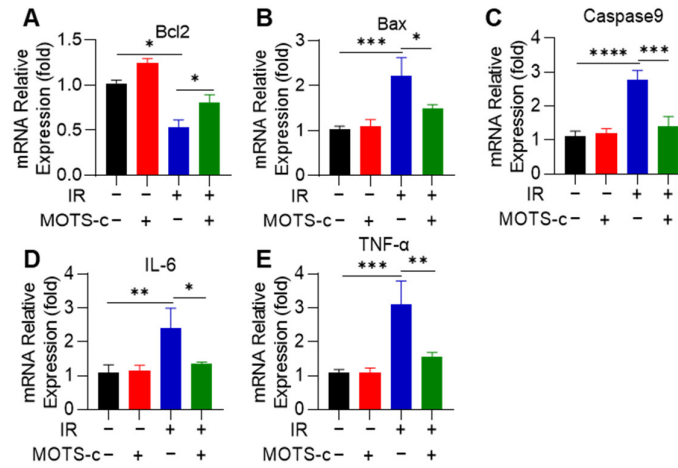

**Figure. S2** MOTS-c prevented the apoptosis of alveolar epithelial cells in RP mice. (A-E) The mRNA level of *Bcl2*, *Bax*, *Caspase9*, *IL-6*, and *TNF-α* were measured by quantitative real-time PCR in primary mouse alveolar epithelial cells.  $n=3$ , \* $P<0.05$ , \*\* $P<0.01$ , \*\*\* $P<0.001$ , \*\*\*\* $P<0.0001$ .

**Figure S3**

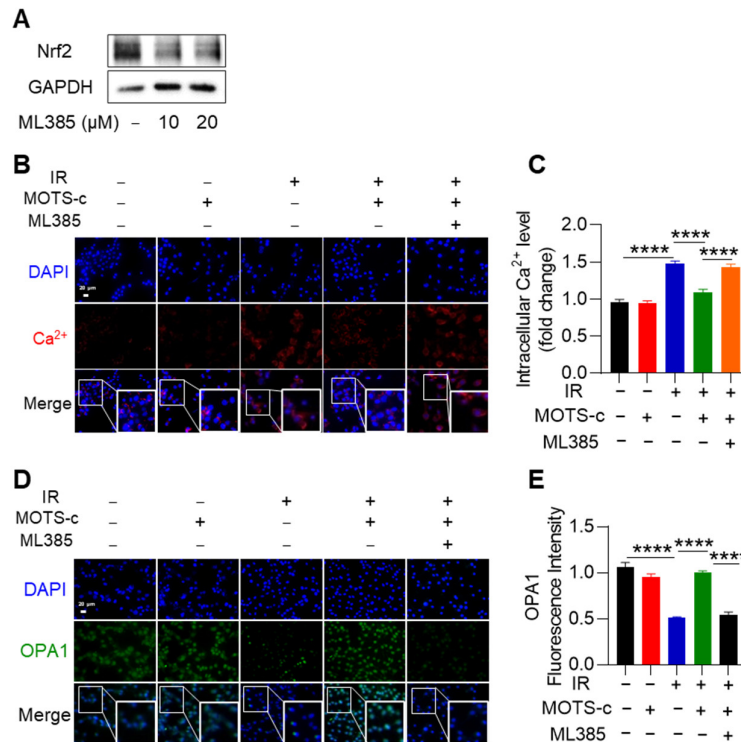

**Figure. S3** MOTS-c relieved radiation-induced mitochondrial damage in MLE-12 cells. (A) The expression of GAPDH and Nrf2 were analyzed by western blot. (B, C) Rhod-2, AM Red fluorescent probe (4 μM) was used to detect calcium content in MLE-12, scale bar=20 μm. (D, E) Lung tissue

sections were stained with the OPA1 (green), and DAPI (blue) for immunofluorescence analysis, scale bar=20  $\mu\text{m}$ .  $n=5$ , \*\*\*\* $P<0.0001$ .

**Figure S4**

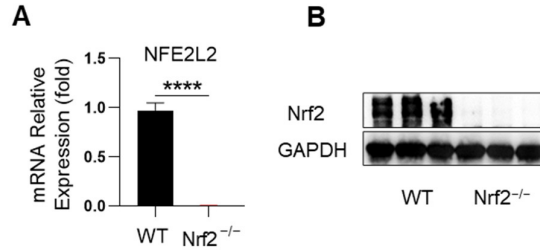

**Figure. S4** Gene identification results in WT and Nrf2<sup>-/-</sup> mice. (A) RT-PCR analysis of *NFE2L2* in WT and Nrf2<sup>-/-</sup> mice. (B) The expression of GAPDH and Nrf2 were analyzed by western blot.  $n=5$ , \*\*\*\* $P<0.0001$ .

**Figure S5**

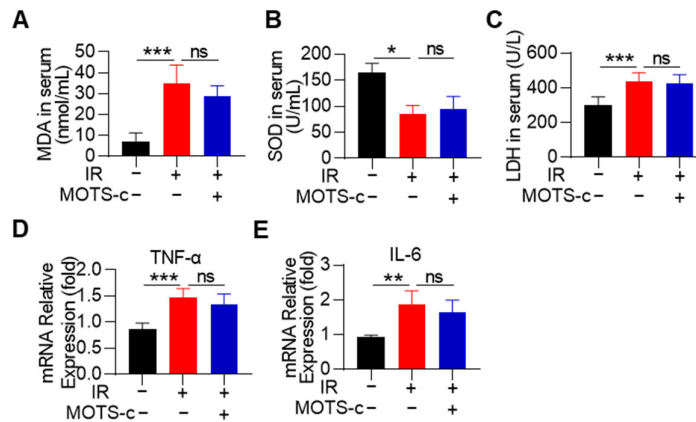

**Figure. S5** Nrf2 deficiency abolished the protective function of MOTS-c on RP mice. (A-C) MDA, SOD, and LDH in serum were determined. (D-E) The mRNA levels of IL-6, and TNF- $\alpha$  were measured by quantitative real-time PCR.  $n=5$ , ns means no significant difference, \* $P<0.05$ , \*\* $P<0.01$ , \*\*\* $P<0.001$ .
