# Supplementary figures and images for: The Mitochondrial-Derived Peptide MOTS-c Alleviates Radiation Pneumonitis via an Nrf2-Dependent Mechanism
Source: MDPI journal article supplement (doi:10.3390/antiox13050613), 2024-05-17

### Supplemental Figure.3A

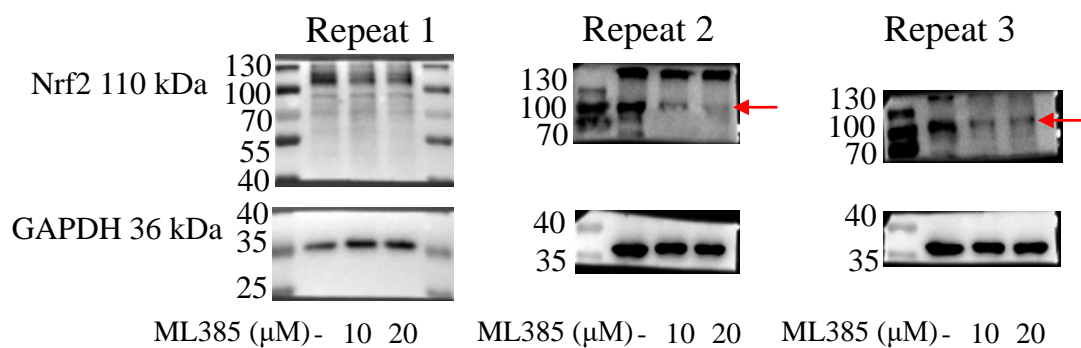

### Supplemental Figure.4B

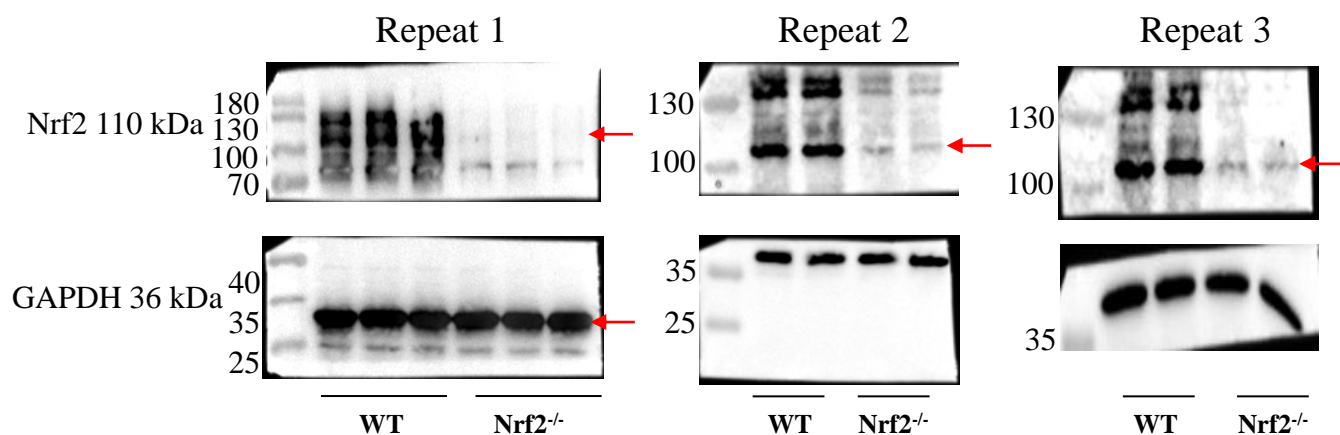

Supplement: s1 [file s1]
